# Supplementary material for: Tight-binding quantum chemical molecular dynamics simulations for the elucidation of chemical reaction dynamics in SiC etching with SF6/O2 plasma
Source: Royal Society of Chemistry journal article supplement (doi:10.1039/c5cp06515a), 2016-01-01
Supplement: c5cp06515a1.pdf [file c5cp06515a1.pdf]

Supporting Information for:

**Tight-Binding Quantum Chemical Molecular Dynamics Simulations for  
the Elucidation of Chemical Reaction Dynamics in SiC Etching with  
SF<sub>6</sub>/O<sub>2</sub> Plasma**

Hiroshi Ito, Takuya Kuwahara, Kentaro Kawaguchi, Yuji Higuchi, Nobuki Ozawa, and  
Momoji Kubo\*

Institute for Materials Research, Tohoku University, 2-1-1 Katahira, Aoba-ku, Sendai  
980 - 8577, Japan.

\*Corresponding author:

E-mail: momoji@imr.tohoku.ac.jp (M. Kubo)

Tel: +81-22-215-2050.

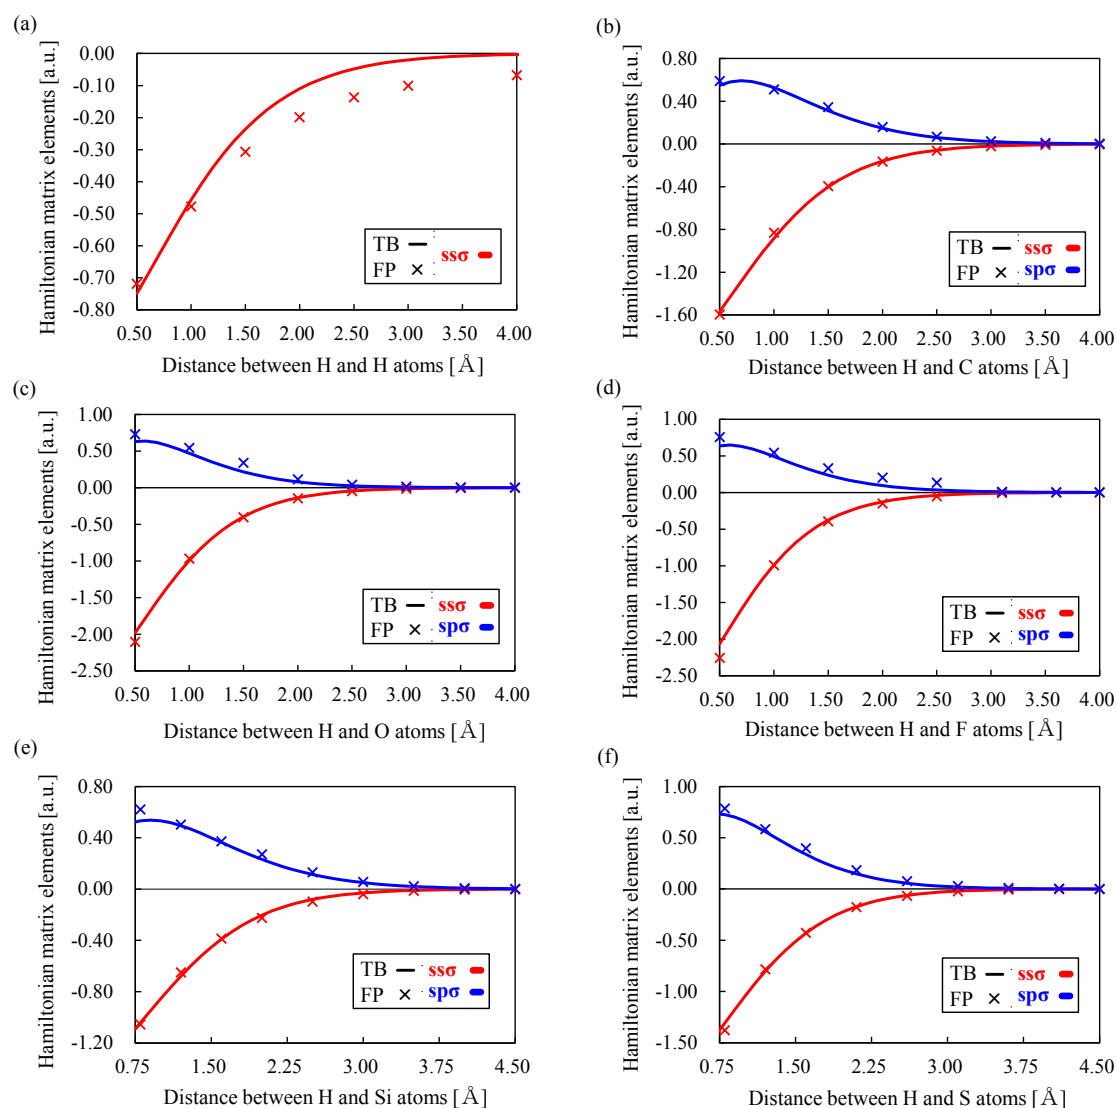

Figure S1. Hamiltonian matrix elements calculated by using the TB-QCMD (TB) with the parameters in Table 2 of the main text and the first-principles (FP) method. Since the TB-QCMD is performed with a minimal basis set, the Hartree-Fock method with the STO-3G basis set is employed as a first-principles method. Figures (a) through (u) show interactions of H-H, H-C, H-O, H-F, H-Si, H-S, C-C, C-O, C-F, C-Si, C-S, O-O, O-F, O-Si, O-S, F-F, F-Si, F-S, Si-Si, Si-S, and S-S atom pairs, respectively.

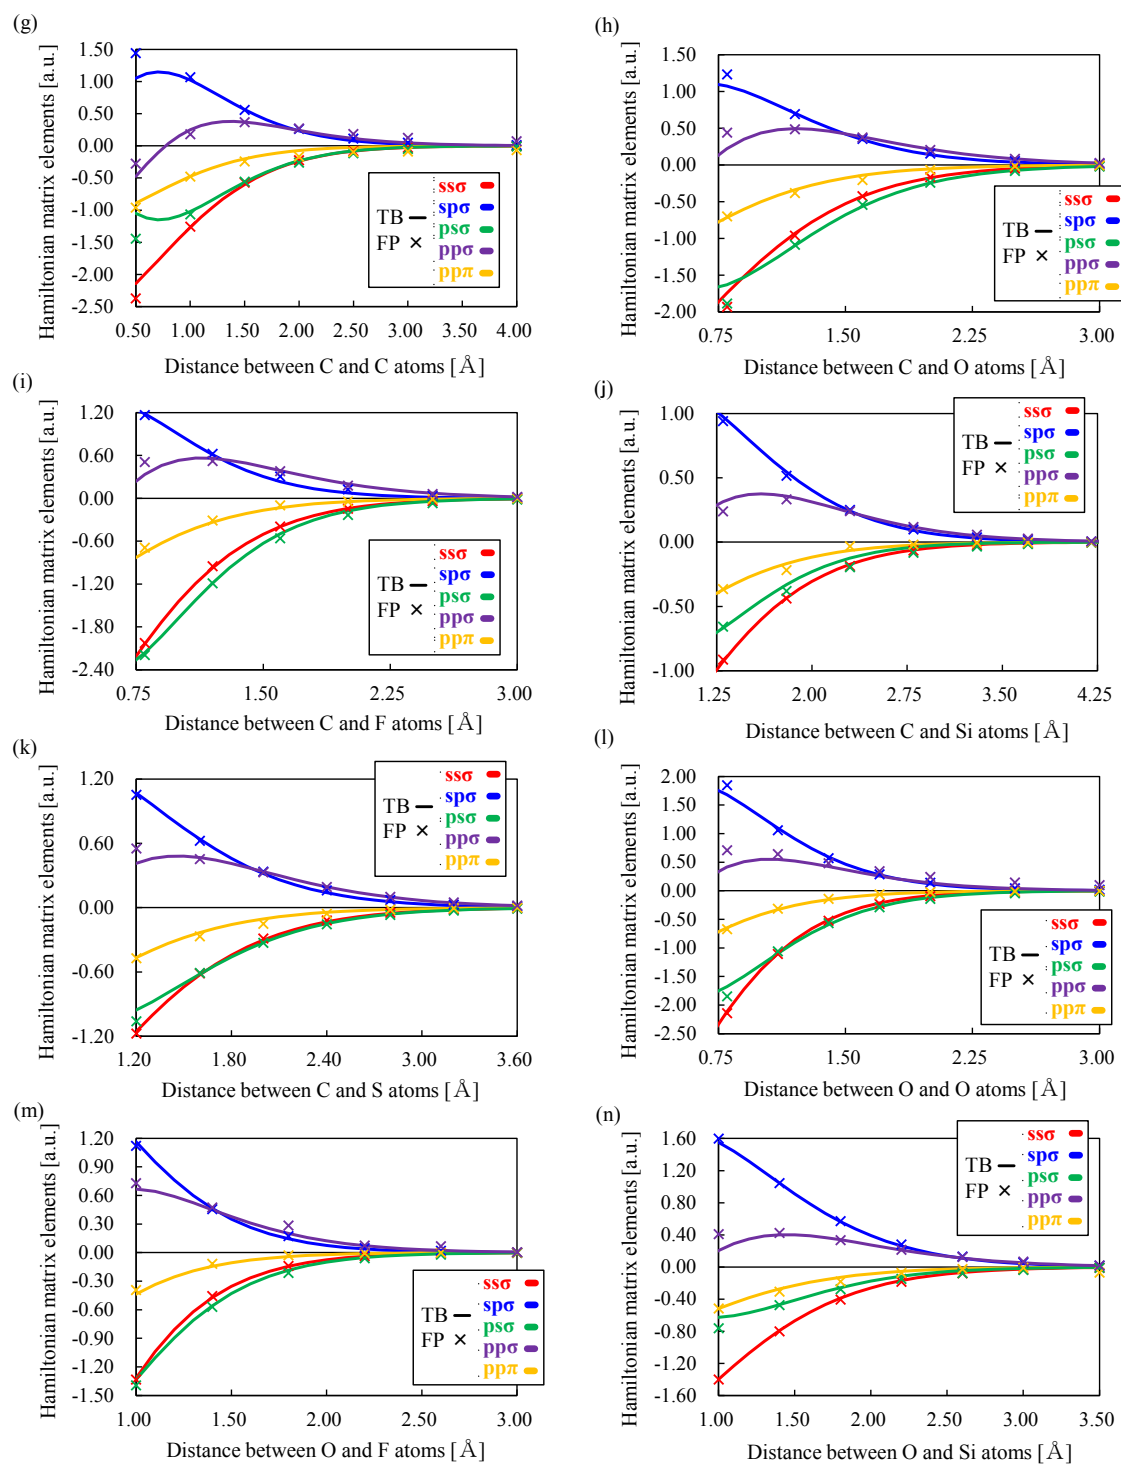

Figure S1. (Continued)

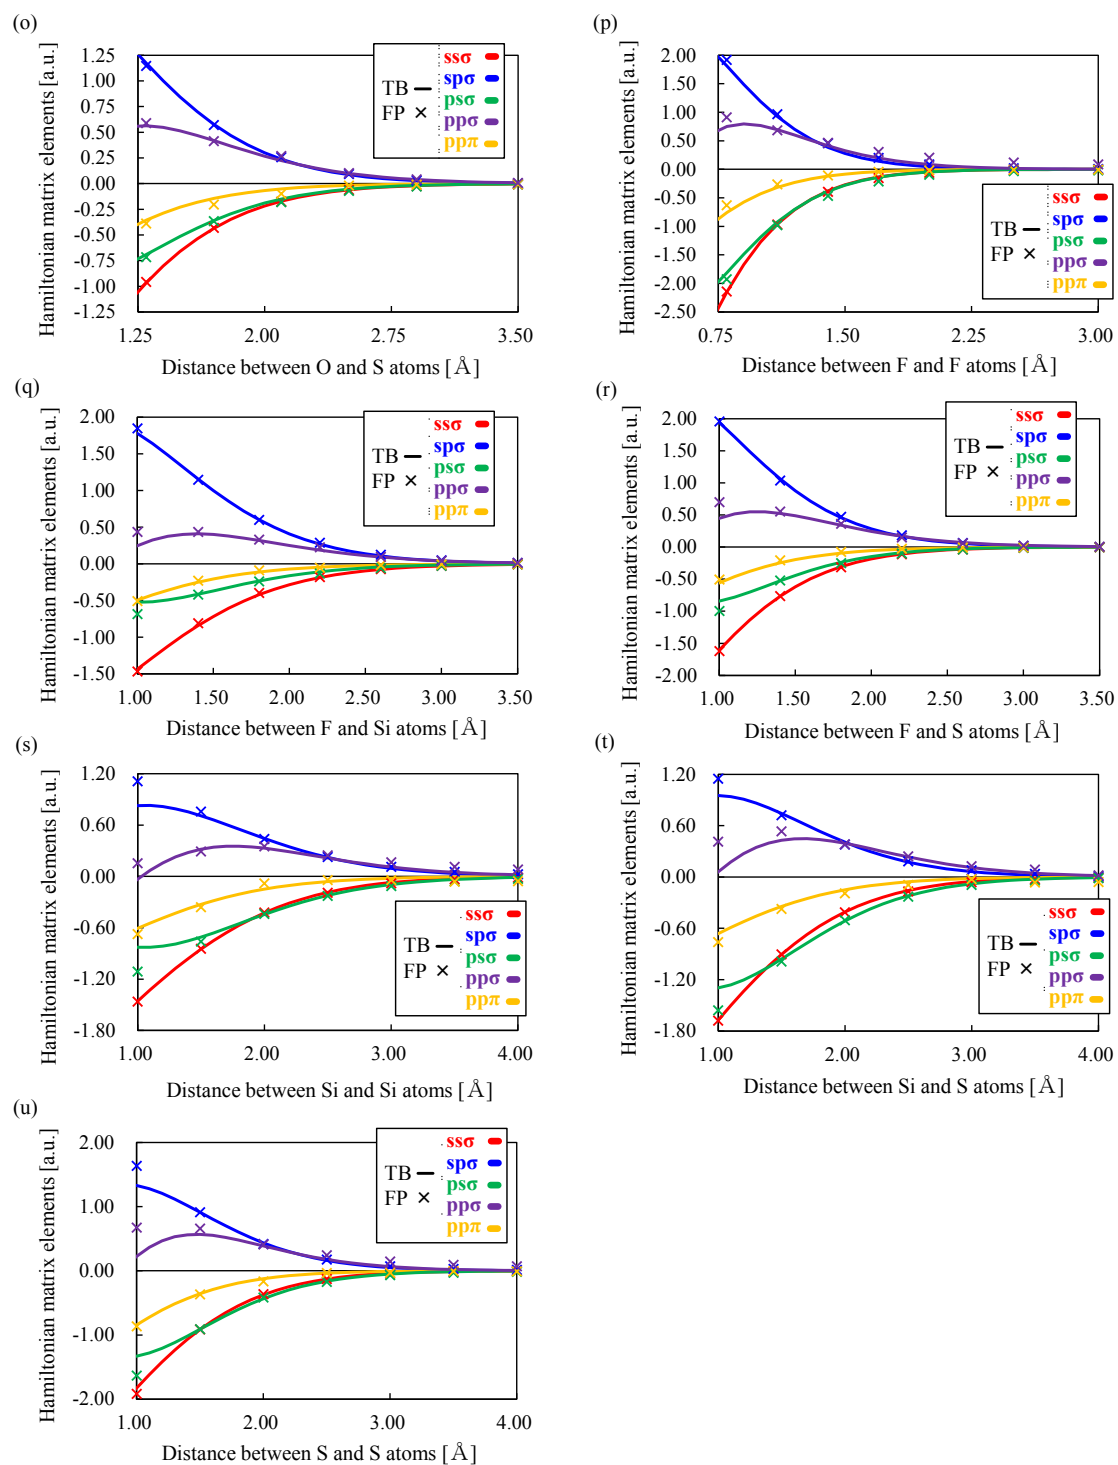

Figure S1. (Continued)

Table S1. Bond lengths (Å) calculated by using the TB-QCMD and first-principles methods. First-principles calculations are performed with Dmol<sup>3</sup> code [49] and Gaussian 03 program [S1]. DFT calculations within the generalized gradient approximation (GGA) with the Perdew-Wang exchange correlation functional (PW91) and within the local density approximations (LDA) with the Vosko-Wilk-Nusair (VWN) functional using double zeta plus polarization function (DNP) basis set are performed by using Dmol<sup>3</sup> code. By using Gaussian 03 program, B3LYP/6-311G, MP2/6-311G, and Hartree-Fock(HF)/6-31G calculations are also performed.

| Bond    | Experiments <sup>S2</sup> | TB-QCMD | GGA<br>PW91/DNP | LDA<br>VWN/DNP | B3LYP<br>/6-311G   | MP2<br>/6-311G | HF/6-31G |
|---------|---------------------------|---------|-----------------|----------------|--------------------|----------------|----------|
| H - H   | 0.741                     | 0.730   | 0.748           | 0.763          | 0.742              | 0.737          | 0.730    |
| H - C   | 1.087                     | 1.051   | 1.096           | 1.097          | 1.089              | 1.092          | 1.082    |
| H - O   | 0.958                     | 0.981   | 0.969           | 0.971          | 0.971              | 0.969          | 0.950    |
| H - F   | 0.917                     | 0.921   | 0.931           | 0.933          | 0.940              | 0.937          | 0.921    |
| H - Si  | 1.480                     | 1.432   | 1.489           | 1.495          | 1.493              | 1.501          | 1.492    |
| H - S   | 1.336                     | 1.284   | 1.355           | 1.357          | 1.385              | 1.381          | 1.353    |
| C - C   | 1.530                     | 1.544   | 1.547           | 1.530          | 1.555 <sup>b</sup> |                |          |
| C - O   | 1.160                     | 1.219   | 1.175           | 1.168          | 1.185              | 1.202          | 1.161    |
| C - F   | 1.323                     | 1.367   | 1.340           | 1.323          | 1.371              | 1.379          | 1.341    |
| C - Si  | 1.874                     | 1.886   | 1.896-1.911     | 1.875-1.890    |                    |                |          |
| C - S   | 1.553                     | 1.644   | 1.569           | 1.558          | 1.591              | 1.606          | 1.584    |
| O - O   | 1.207                     | 1.278   | 1.224           | 1.211          | 1.256              | 1.325          | 1.195    |
| O - F   | 1.405                     | 1.450   | 1.428           | 1.399          | 1.475              | 1.515          | 1.418    |
| O - Si  | 1.663                     | 1.712   | 1.631-1.632     | 1.617-1.618    | 1.656 <sup>b</sup> |                |          |
| O - S   | 1.431                     | 1.488   | 1.479           | 1.464          | 1.604              | 1.622          | 1.555    |
| F - F   | 1.412                     | 1.468   | 1.422           | 1.394          | 1.469              | 1.506          | 1.413    |
| F - Si  | 1.553                     | 1.533   | 1.582           | 1.565          | 1.636              | 1.637          | 1.625    |
| F - S   | 1.561                     | 1.558   | 1.614           | 1.587          | 1.760              | 1.767          | 1.676    |
| Si - Si | 2.359                     | 2.352   | 2.370           | 2.340          | 2.415 <sup>b</sup> |                |          |
| Si - S  | 2.145                     | 2.098   | 2.155           | 2.133          |                    |                |          |
| S - S   | 2.070                     | 2.062   | 2.092           | 2.065          | 2.254              | 2.269          | 2.211    |

Reference S2: D. R. Lide, *Comprehensive Handbook of Chemical Bond Energies*, CRC Press, USA, 2009.

Mark b: B3LYP/6-31G (diamond, silicon dioxide, and silicon crystals)

Table S2. Reaction energies (kcal/mol) of main molecules and radicals used in the etching simulation. The first-principles calculations are performed with Dmol<sup>3</sup> code [49] and Gaussian 03 program [S1]. The DFT calculations within GGA PW91 and LDA VWN functional using DNP basis set are performed by using Dmol<sup>3</sup> code. By using Gaussian 03 program, B3LYP/6-311G, MP2/6-311G, and Hartree-Fock(HF)/6-31G calculations are also performed.

| Reaction          |   |                  |   |                   |                    | TB-<br>QCMD | GGA<br>PW91 | LDA<br>VWN | B3LYP  | MP2    | HF     |
|-------------------|---|------------------|---|-------------------|--------------------|-------------|-------------|------------|--------|--------|--------|
| SF <sub>4</sub>   | + | SF <sub>2</sub>  | → | 2SF <sub>3</sub>  |                    | -78.55      | -16.40      | -21.54     | -69.55 | -61.27 | -73.77 |
| SF <sub>5</sub>   | + | SiF <sub>3</sub> | → | SF <sub>4</sub>   | + SiF <sub>4</sub> | 140.40      | 112.28      | 114.03     | 88.07  | 123.13 | 123.00 |
| SF <sub>3</sub>   | + | SiF <sub>2</sub> | → | SF <sub>2</sub>   | + SiF <sub>3</sub> | 32.28       | 33.34       | 30.70      | 68.51  | 93.61  | 92.02  |
| SF <sub>2</sub>   | + | SiF              | → | SF                | + SiF <sub>2</sub> | 54.55       | 61.08       | 61.51      | 66.26  | 79.54  | 75.78  |
| SF <sub>4</sub>   | + | CF <sub>3</sub>  | → | SF <sub>3</sub>   | + CF <sub>4</sub>  | 77.05       | 40.90       | 42.28      | 34.05  | 48.26  | 40.53  |
| SF <sub>3</sub>   | + | CF <sub>3</sub>  | → | SF <sub>2</sub>   | + CF <sub>4</sub>  | 155.60      | 57.30       | 63.82      | 103.60 | 109.53 | 114.30 |
| SF <sub>2</sub>   | + | CF <sub>2</sub>  | → | SF                | + CF <sub>3</sub>  | 29.32       | 0.85        | 1.47       | 17.72  | 42.73  | 42.83  |
| SiF <sub>2</sub>  | + | CF <sub>2</sub>  | → | SiF               | + CF <sub>3</sub>  | -25.23      | -60.23      | -60.05     | -48.54 | -36.81 | -32.96 |
| CH <sub>4</sub>   | + | CH <sub>2</sub>  | → | 2CH <sub>3</sub>  |                    | 19.49       | 4.50        | 2.41       | 22.80  | 27.58  | 37.26  |
| SiH <sub>4</sub>  | + | SiH <sub>2</sub> | → | 2SiH <sub>3</sub> |                    | -22.52      | -17.05      | -20.00     | -13.33 | -2.19  | -6.40  |
| CH <sub>3</sub>   | + | SiH              | → | CH <sub>2</sub>   | + SiH <sub>2</sub> | -35.65      | -38.57      | -40.48     | -66.89 | -69.51 | -72.36 |
| COF <sub>2</sub>  | + | COH <sub>2</sub> | → | 2CO               | + 2HF              | -49.30      | -17.42      | -39.60     | -12.63 | 21.69  | 8.15   |
| 2COH <sub>2</sub> |   |                  | → | CO <sub>2</sub>   | + CH <sub>4</sub>  | 87.76       | 63.35       | 66.82      | 54.08  | 47.04  | 49.43  |
| 2COF <sub>2</sub> |   |                  | → | CO <sub>2</sub>   | + CF <sub>4</sub>  | 37.58       | 22.58       | 23.17      | 22.14  | 27.48  | 28.51  |
| SiH <sub>4</sub>  | + | OH               | → | SiH <sub>3</sub>  | + H <sub>2</sub> O | 15.14       | 30.86       | 39.48      | -2.10  | 9.15   | -4.09  |

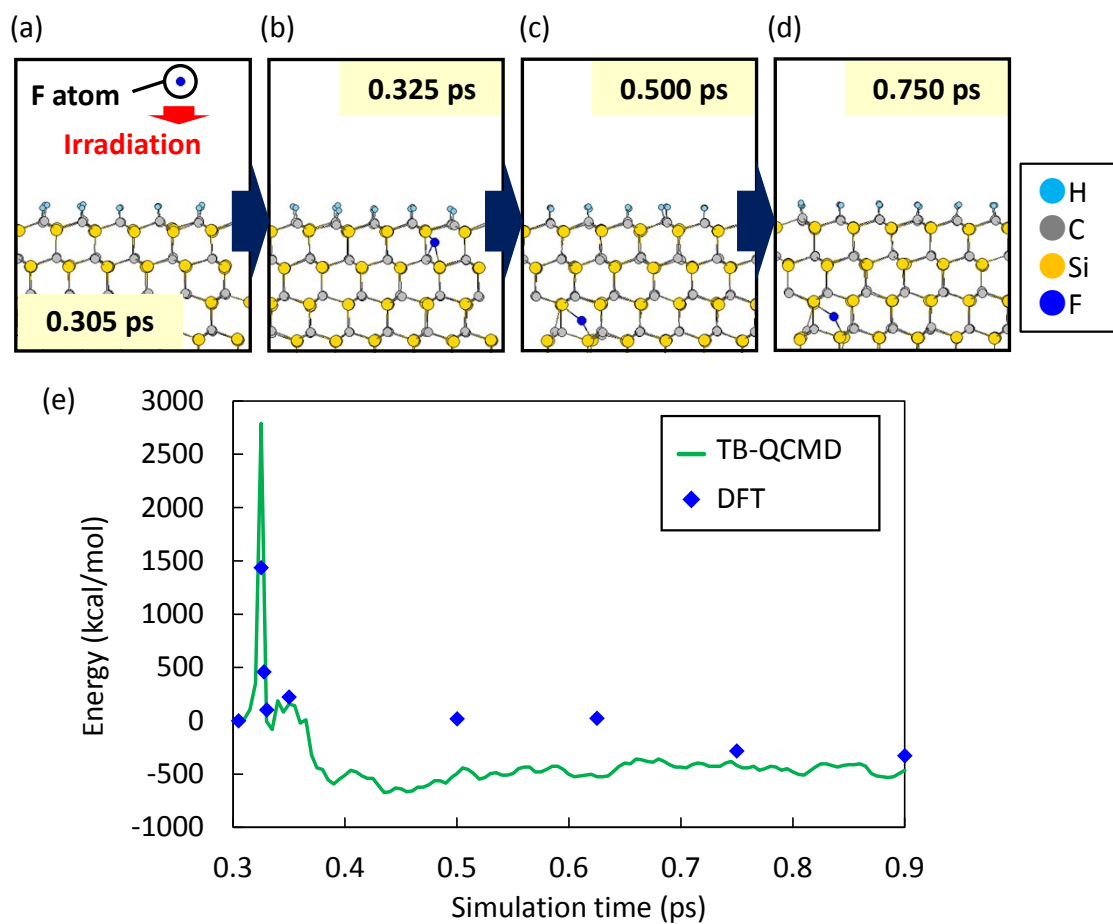

Figure S2. Time evolution of the energy (kcal/mol) during the irradiation of F atom to the SiC surface terminated by H atoms. Snapshots of the TB-QCMD simulation at (a) 0.305 ps, (b) 0.325 ps, (c) 0.500 ps, and (d) 0.750 ps are shown. (e) Energy change during the TB-QCMD simulation and energies by the static DFT (GGA PW91/DNP) calculations. The static DFT calculations are performed with the structures of the TB-QCMD simulations at 0.305, 0.325, 0.328, 0.330, 0.350, 0.500, 0.625, 0.750, and 0.900 ps.

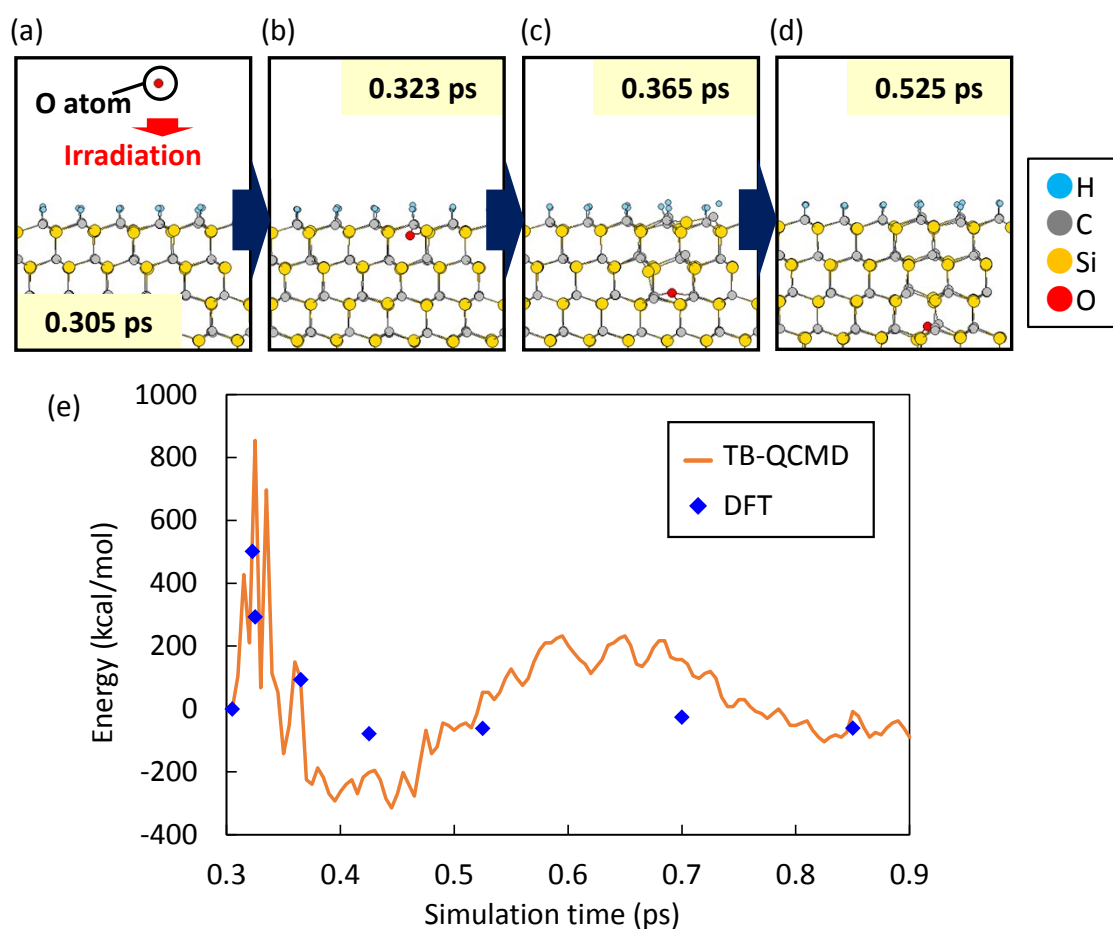

Figure S3. Time evolution of the energy (kcal/mol) during the irradiation of O atom to the SiC surface terminated by H atoms. Snapshots of the TB-QCMD simulation at (a) 0.305 ps, (b) 0.323 ps, (c) 0.365 ps, and (d) 0.525 ps are shown. (e) Energy change during the TB-QCMD simulation and energies by the static DFT (GGA PW91/DNP) calculations. The static DFT calculations are performed with the structures of the TB-QCMD simulations at 0.305, 0.323, 0.325, 0.365, 0.425, 0.525, 0.700, and 0.850 ps.



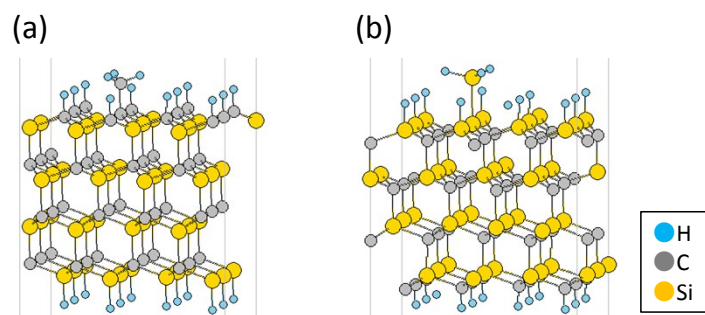

Figure S4. Simulation models for the calculations of binding energies of (a) C-C and (b) Si-Si bonds generated on the SiC surface.

#### References

- [49] B. Delley, *J. Chem. Phys.*, 2000, **113**, 7756-7764.
- [S1] M. J. Frisch, G. W. Trucks, H. B. Schlegel, G. E. Scuseria, M. A. Robb, J. R. Cheeseman, J. A. Montgomery, Jr., T. Vreven, K. N. Kudin, J. C. Burant, J. M. Millam, S. S. Iyengar, J. Tomasi, V. Barone, B. Mennucci, M. Cossi, G. Scalmani, N. Rega, G. A. Petersson, H. Nakatsuji, M. Hada, M. Ehara, K. Toyota, R. Fukuda, J. Hasegawa, M. Ishida, T. Nakajima, Y. Honda, O. Kitao, H. Nakai, M. Klene, X. Li, J. E. Knox, H. P. Hratchian, J. B. Cross, V. Bakken, C. Adamo, J. Jaramillo, R. Gomperts, R. E. Stratmann, O. Yazyev, A. J. Austin, R. Cammi, C. Pomelli, J. W. Ochterski, P. Y. Ayala, K. Morokuma, G. A. Voth, P. Salvador, J. J. Dannenberg, V. G. Zakrzewski, S. Dapprich, A. D. Daniels, M. C. Strain, O. Farkas, D. K. Malick, A. D. Rabuck, K. Raghavachari, J. B. Foresman, J. V. Ortiz, Q. Cui, A. G. Baboul, S. Clifford, J. Cioslowski, B. B. Stefanov, G. Liu, A. Liashenko, P. Piskorz, I. Komaromi, R. L. Martin, D. J. Fox, T. Keith, M. A. Al-Laham, C. Y. Peng, A. Nanayakkara, M. Challacombe, P. M. W. Gill, B. Johnson, W. Chen, M. W. Wong, C. Gonzalez, and J. A. Pople, Gaussian, Inc., Wallingford CT, 2004.

[S2] D. R. Lide, *Comprehensive Handbook of Chemical Bond Energies*, CRC Press, USA, 2009.
